# Supplementary material for: How Is Endodontics Taught in Italy? A Survey of Italian Dental Schools
Source: MDPI journal article supplement (doi:10.3390/jcm11237190), 2022-12-02

## Supporting information

Supplemental material File S1

Questionnaire adapted from Al Raisi et al., 2019 [12].

1. What learning activities does the Endodontics course consist of? (it is possible to mark more than one answer)

- ☐ Lectures
- ☐ Pre-clinical training
- ☐ Clinical training
- ☐ Others \_\_\_\_\_

2. In what year/years is endodontics taught? (it is possible to mark more than one answer)

- ☐ First year
- ☐ Second year
- ☐ Third year
- ☐ Fourth year
- ☐ Fifth year
- ☐ Sixth year

3. What teaching methods are used? (it is possible to mark more than one answer)

- ☐ Frontal lectures
- ☐ Seminars
- ☐ Study group
- ☐ Independent study
- ☐ Projects
- ☐ E-learning
- ☐ Video
- ☐ Manuals
- ☐ Reading lists
- ☐ Problem based learning
- ☐ Other \_\_\_\_\_

4. In which year/years are the specific topics of the Endodontics program taught? (it is possible to mark more than one answer)

|                                       | First                    | Second                   | Third                    | Fourth                   | Fifth                    | Sixth                    | Not taught               |
|---------------------------------------|--------------------------|--------------------------|--------------------------|--------------------------|--------------------------|--------------------------|--------------------------|
| Root canal anatomy and pulp histology | <input type="checkbox"/> |
| Pulp physio-pathology                 | <input type="checkbox"/> |
| Endodontic microbiology               | <input type="checkbox"/> |
|                                       |                          |                          |                          |                          |                          |                          |                          |

|                                           |                          |                          |                          |                          |                          |                          |                          |
|-------------------------------------------|--------------------------|--------------------------|--------------------------|--------------------------|--------------------------|--------------------------|--------------------------|
| Endodontic radiology                      | <input type="checkbox"/> |
| Endodontic materials                      | <input type="checkbox"/> |
| Vital pulp therapy                        | <input type="checkbox"/> |
| Non surgical endodontic treatment         | <input type="checkbox"/> |
| Root canal treatment of immature teeth    | <input type="checkbox"/> |
| Retreatments                              | <input type="checkbox"/> |
| Surgical endodontics                      | <input type="checkbox"/> |
| Regenerative endodontics                  | <input type="checkbox"/> |
| Post-endodontic restoration               | <input type="checkbox"/> |
| Bleaching of endodontically treated teeth | <input type="checkbox"/> |
| Dental trauma and emergencies             | <input type="checkbox"/> |

5. What is the number of hours allocated for teaching the following topics?

- Root canal anatomy and pulp histology
- Pulp physio-pathology and endodontic microbiology
- Endodontic radiology
- Endodontic materials
- Vital pulp therapy
- Non surgical endodontic treatment
- Root canal treatment of immature teeth
- Retreatments
- Surgical endodontics
- Regenerative endodontics
- Post-endodontic restoration
- Bleaching of endodontically treated teeth

- Dental trauma and emergencies

6. What is the qualification of the course leader?

- ☐ Full professor
- ☐ Associate professor
- ☐ Researcher
- ☐ Temporarily lecturer
- ☐ Other \_\_\_\_\_

7. Which is the main clinical activity of the course leader?

- ☐ General dentistry
- ☐ General dentistry with particular interest in endodontics
- ☐ Exclusively Endodontics
- ☐ Other \_\_\_\_\_

8. Are there any collaborators in addition to the course manager? If so, how many? What qualification do they have?

---

9. How many students attend the course?

- ☐ 1-14
- ☐ 15-29
- ☐ 30-44
- ☐ 45-59
- ☐ 60-74
- ☐ 75-89
- ☐ 90-104
- ☐ Più di 104

10. What is the staff:students ratio during pre-clinical training?

---

11. What is the staff:students ratio during clinical training?

---

12. What types of endodontic treatments do students perform during pre-clinical training? (it is possible to mark more than one answer)

- ☐ Root canal treatment of single-rooted teeth
- ☐ Root canal treatment of multi-rooted teeth
- ☐ Vital pulp therapy
- ☐ Endodontic surgery
- ☐ Regenerative endodontics
- ☐ Bleaching of endodontically treated teeth
- ☐ Retreatments

13. What types of endodontic treatments do students perform during clinical training? (it is possible to mark more than one answer)

- ☐ Root canal treatment of single-rooted teeth

- ☐ Root canal treatment of multi-rooted teeth
- ☐ Vital pulp therapy
- ☐ Endodontic surgery
- ☐ Regenerative endodontics
- ☐ Bleaching of endodontically treated teeth
- ☐ Retreatments
- ☐ Students do not execute any treatment

14. How many hours are allocated to pre-clinical training?

\_\_\_\_\_

15. What is the average cost in euro that each student has to endure to purchase the material to be used in the pre-clinical training?

\_\_\_\_\_

16. How many hours are allocated to clinical training?

\_\_\_\_\_

17. Which teeth are treated by the students during the pre-clinical training? (it is possible to mark more than one answer)

- ☐ Incisors
- ☐ Canines
- ☐ Premolars
- ☐ Molars

18. Which teeth are treated by the students during the pre-clinical training? (it is possible to mark more than one answer)

- ☐ Incisors
- ☐ Canines
- ☐ Premolars
- ☐ Molars

19. What types of root canals are used in pre-clinical training? (it is possible to mark more than one answer)

- ☐ Canals in natural extracted teeth
- ☐ Canals in commercial plastic teeth
- ☐ Canals in 3D printed teeth
- ☐ Canals in acrylic blocks with simple curves
- ☐ Canals in acrylic blocks with S-shaped curves
- ☐ Other \_\_\_\_\_

20. It is present a clinical area specifically assigned to Endodontics?

- ☐ Yes
- ☐ No

21. Which magnifying systems are used by students during pre-clinical training? (it is possible to mark more than one answer)

- ☐ Magnifying systems are not used

- ☐ Galilean/prismatic loops
- ☐ Microscope
- ☐ Other \_\_\_\_\_

22. Which magnifying systems are used by students during clinical training? (it is possible to mark more than one answer)

- ☐ Magnifying systems are not used
- ☐ Galilean/prismatic loops
- ☐ Microscope
- ☐ Other \_\_\_\_\_

23. Do students use ultrasonic instruments?

- ☐ Yes, only during pre-clinical training
- ☐ Yes, only during clinical training
- ☐ Yes, both during pre-clinical and clinical training
- ☐ No

24. What method of working length determination is used during clinical training?

- ☐ Radiographs
- ☐ Electronic apex locator
- ☐ Radiographs + electronic apex locator
- ☐ Other \_\_\_\_\_

25. Which instruments are used for root canal shaping during pre-clinical training? (it is possible to mark more than one answer)

- ☐ Manual stainless instruments
- ☐ Engine driven rotary NiTi files
- ☐ Engine driven reciprocating NiTi files

26. Which instruments are used for root canal shaping during pre-clinical training? (it is possible to mark more than one answer)

- ☐ Manual stainless instruments
- ☐ Engine driven rotary NiTi files
- ☐ Engine driven reciprocating NiTi files

27. Which irrigants are used during clinical training? (it is possible to mark more than one answer)

- ☐ None
- ☐ Water
- ☐ Saline
- ☐ Local anaesthetic solution
- ☐ Sodium hypochlorite
- ☐ Chlorhexidine
- ☐ EDTA
- ☐ Other \_\_\_\_\_

28. Which method of root canal filling is used during pre-clinical training? (it is possible to mark more than one answer)

- ☐ Single cone technique
- ☐ Cold lateral condensation
- ☐ Vertical hot condensation
- ☐ Thermoplastic injection technique
- ☐ Carrier-based technique
- ☐ Paste fillers
- ☐ Continuous wave of condensation
- ☐ Thermo-mechanic condensation
- ☐ Other \_\_\_\_\_

29. Which method of root canal filling is used during clinical training? (it is possible to mark more than one answer)

- ☐ Single cone technique
- ☐ Cold lateral condensation
- ☐ Vertical hot condensation
- ☐ Thermoplastic injection technique
- ☐ Carrier-based technique
- ☐ Paste fillers
- ☐ Continuous wave of condensation
- ☐ Thermo-mechanic condensation
- ☐ Other \_\_\_\_\_

30. Which type of endodontic dressings are used during clinical training? (it is possible to mark more than one answer)

- ☐ Calcium hydroxide
- ☐ None – canals are left empty in between appointments
- ☐ None – single visit treatment whenever possible
- ☐ Other \_\_\_\_\_

31. Is there a minimum number of canals that students have to treat during pre-clinical training?

- ☐ Yes (how many?)
- ☐ No

32. Is there a minimum number of canals that students have to treat during clinical training?

- ☐ Yes (how many?)
- ☐ No

## Supplemental material File S2

Answers to the questions "In which year/years are the specific topics of the Endodontics program taught? (it is possible to mark more than one answer)"

"Root canal anatomy and pulp histology"

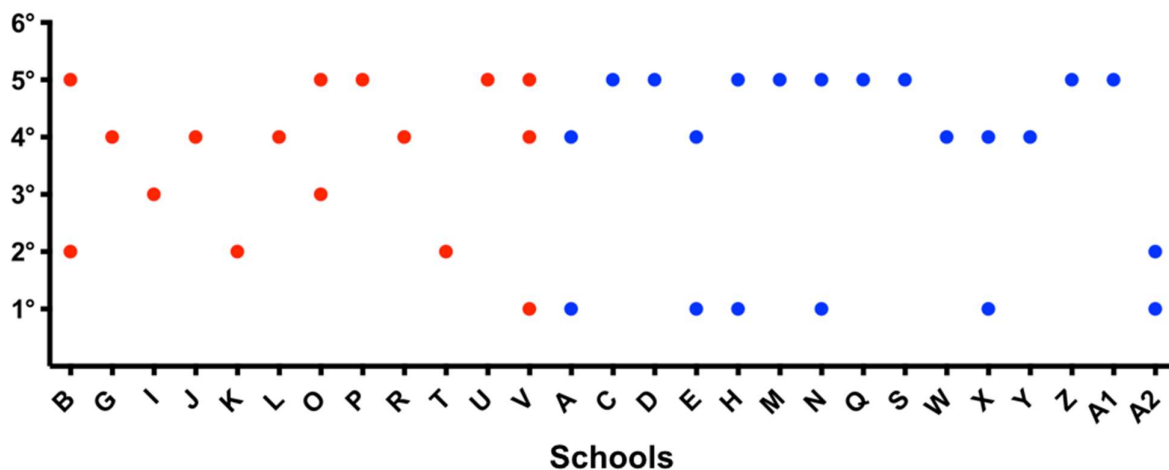

"Pulp physio-pathology"

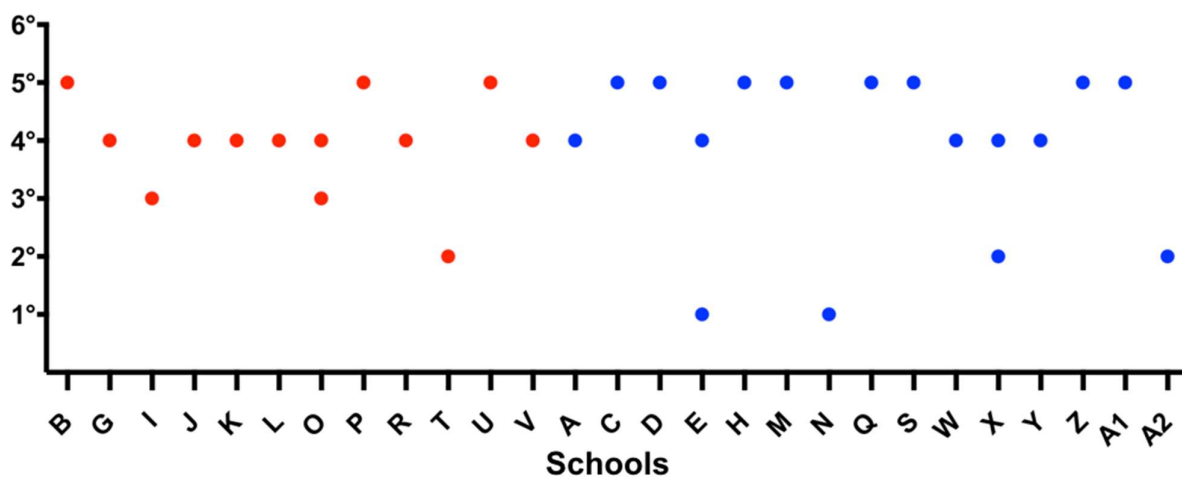

"Endodontic microbiology"

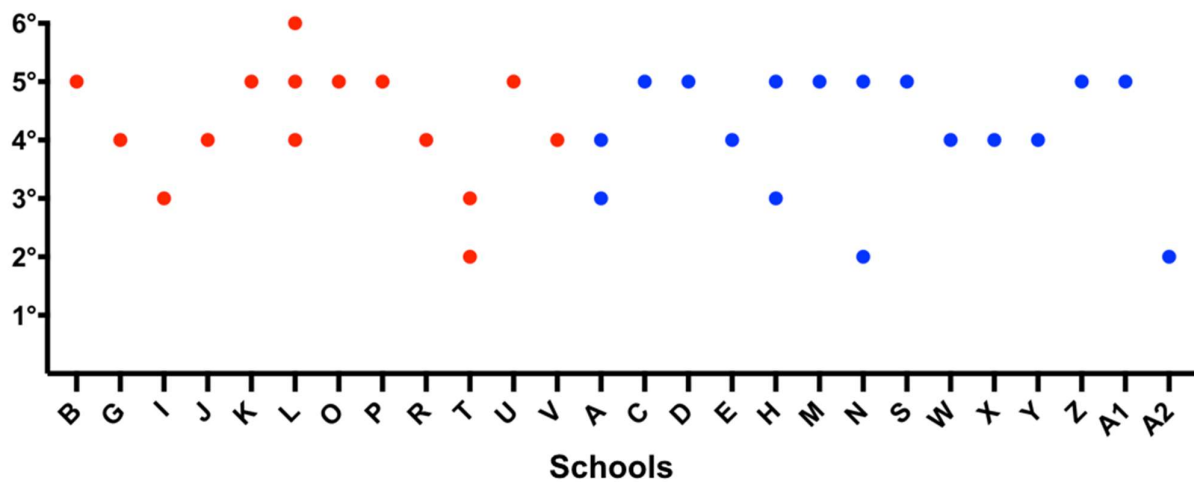

"Endodontic radiology"

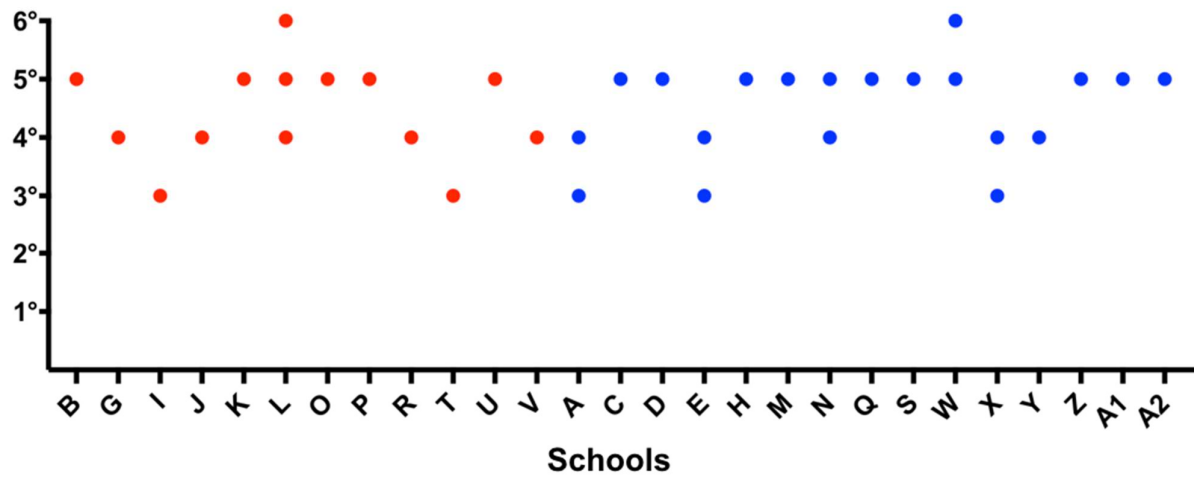

"Endodontic materials"

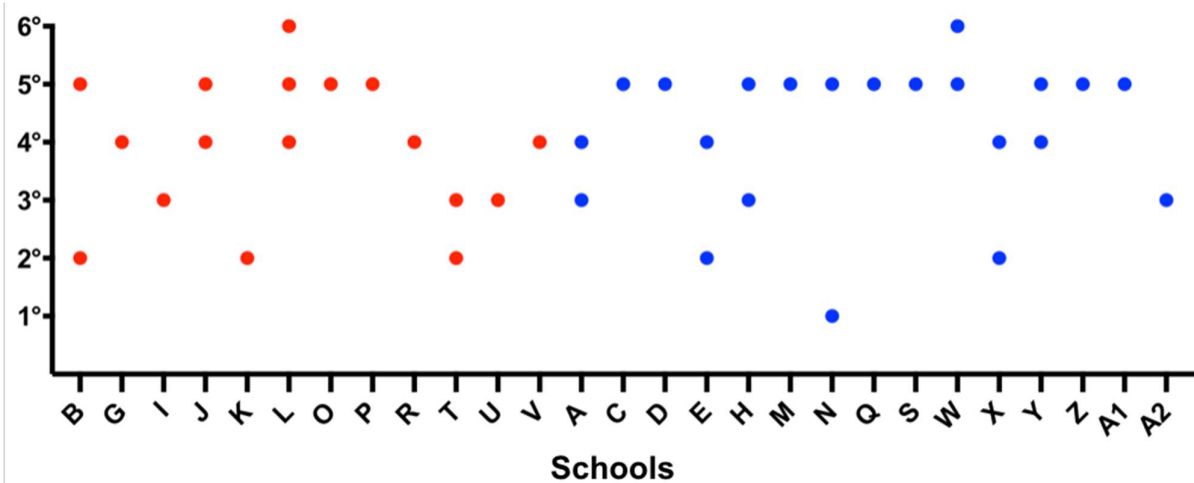

"Vital pulp therapy"



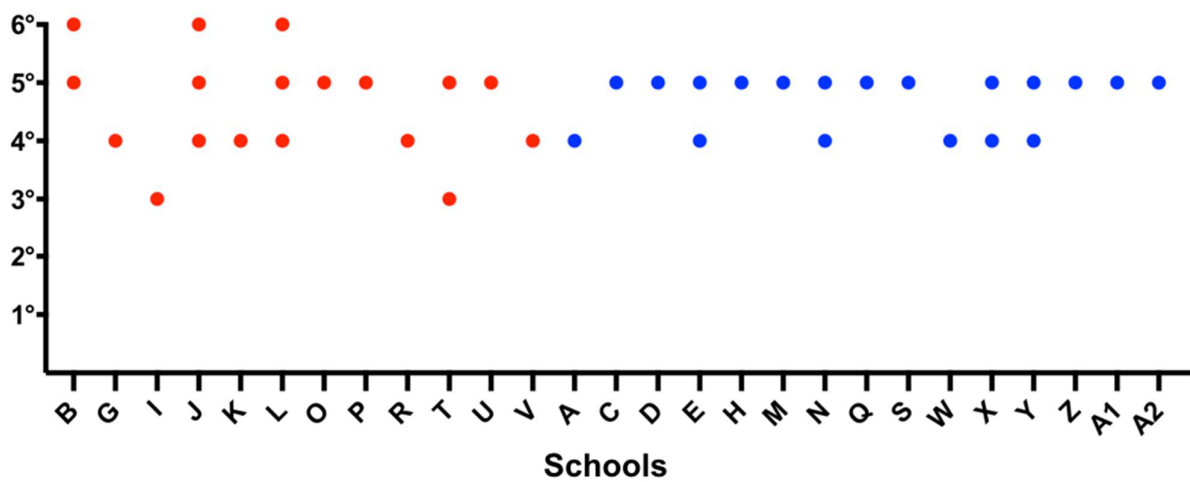

"Root canal treatment"

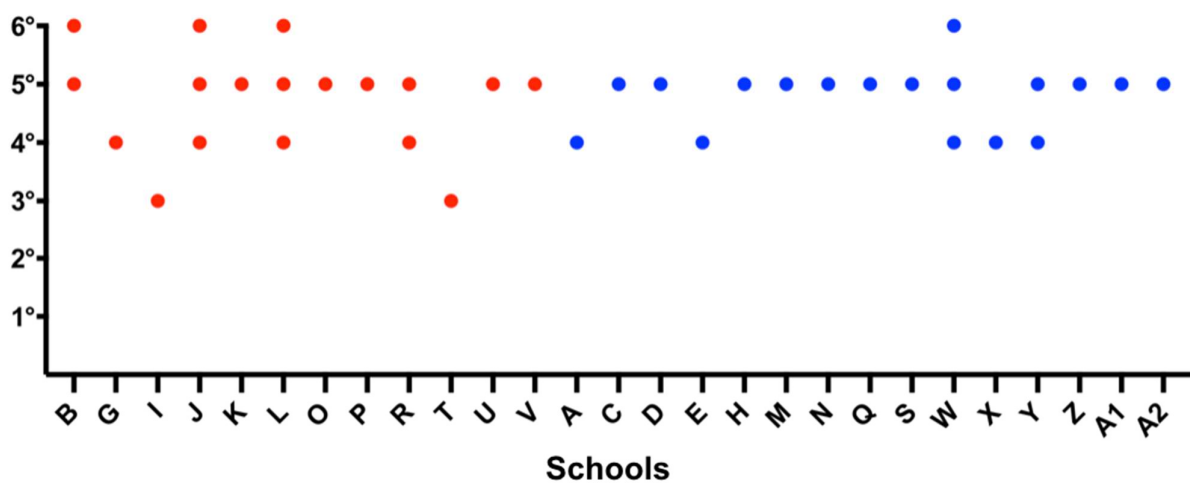

"Root canal treatment of immature teeth"

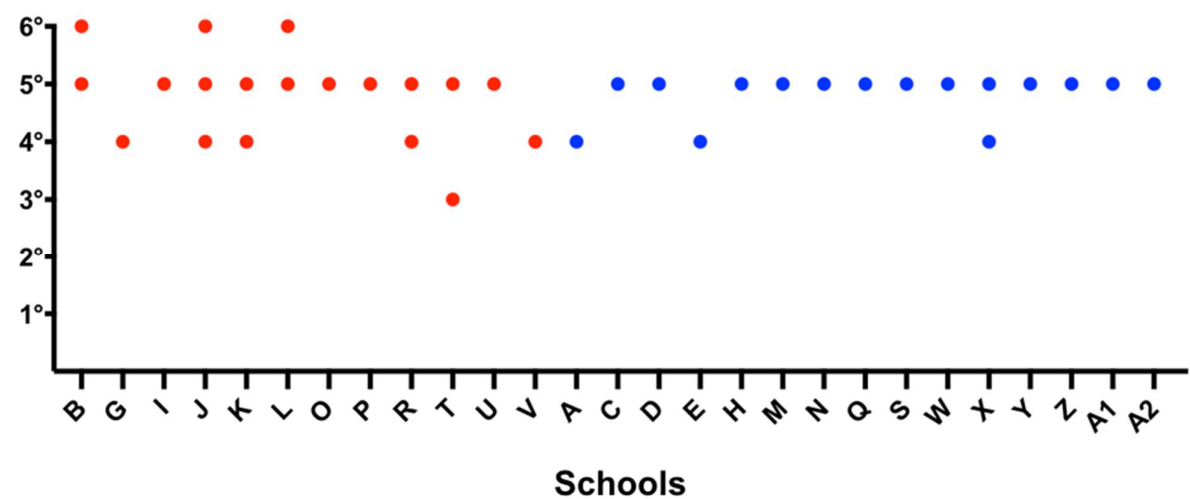

"Retreatment"

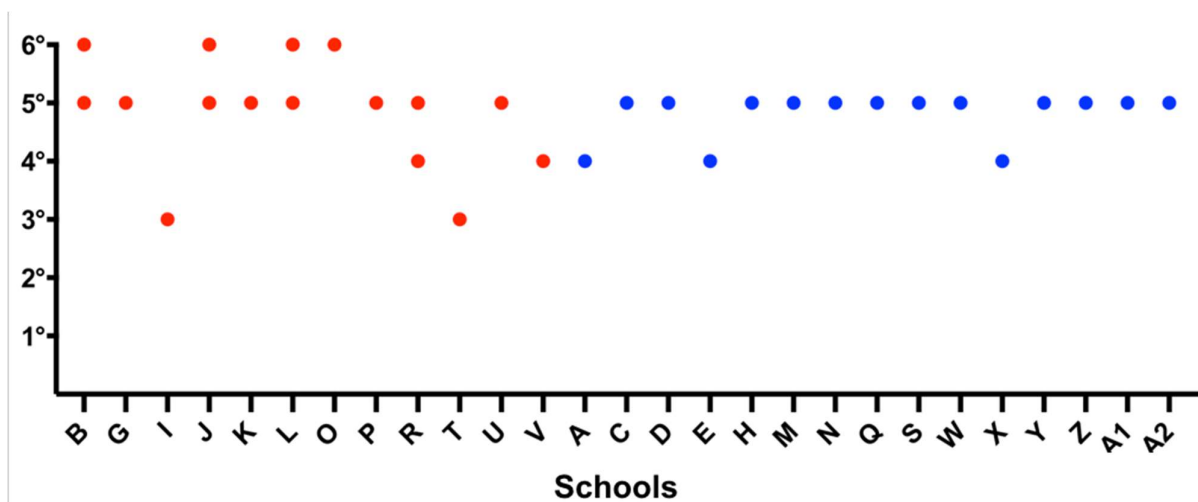

"Endodontic surgery"

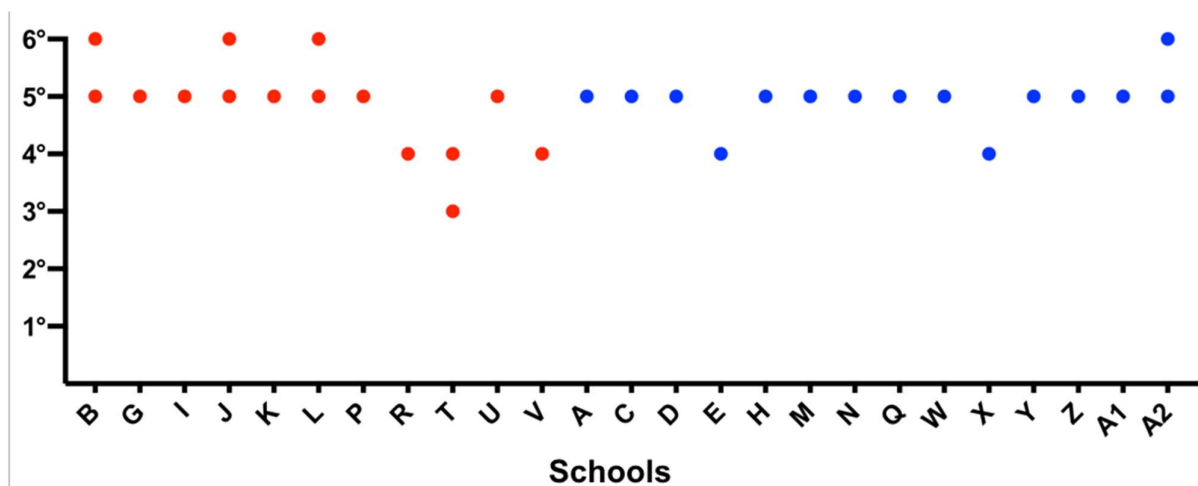

"Regenerative endodontics"

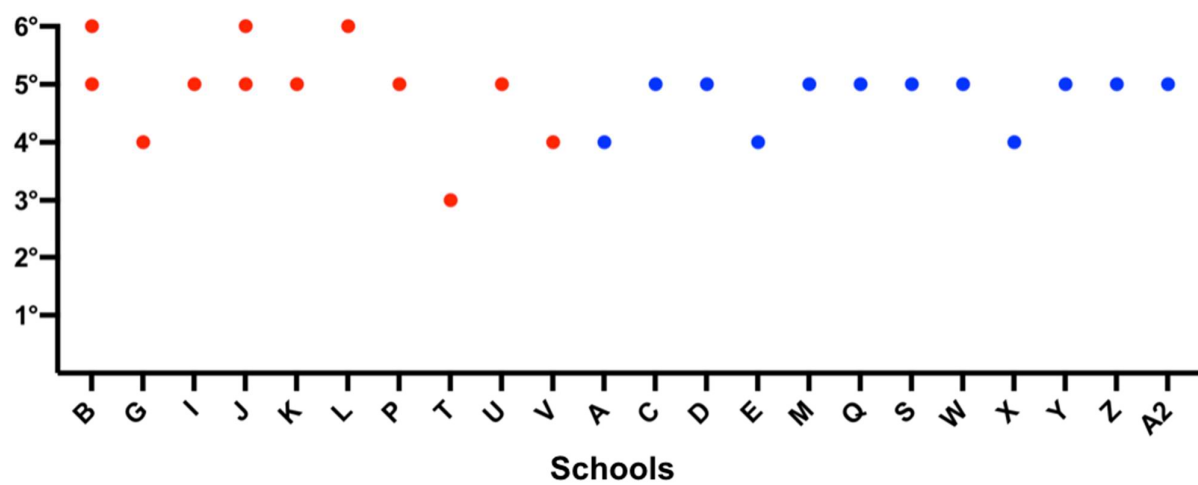

"Post-endodontic restoration"

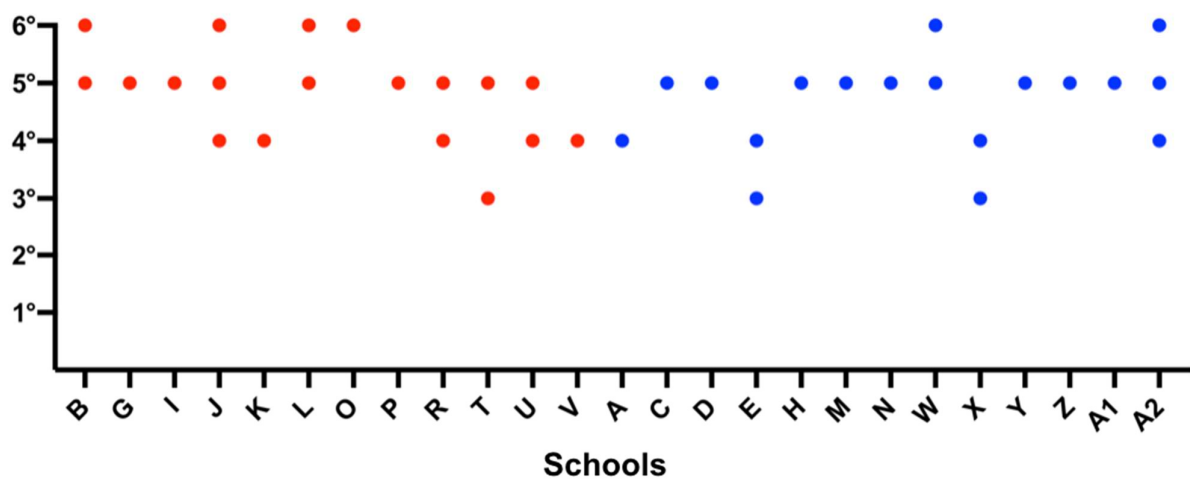

"Bleaching of endodontically treated teeth"

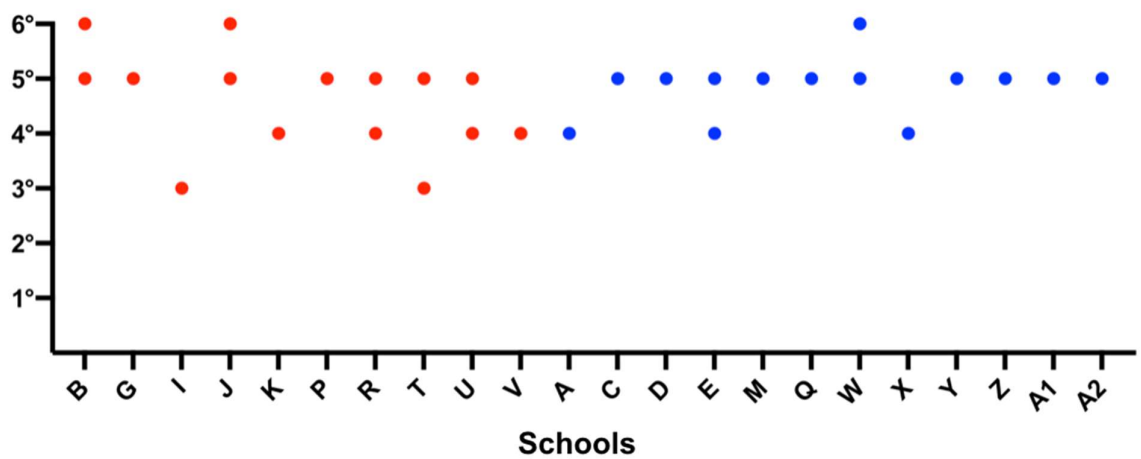

"Dental trauma and emergencies"

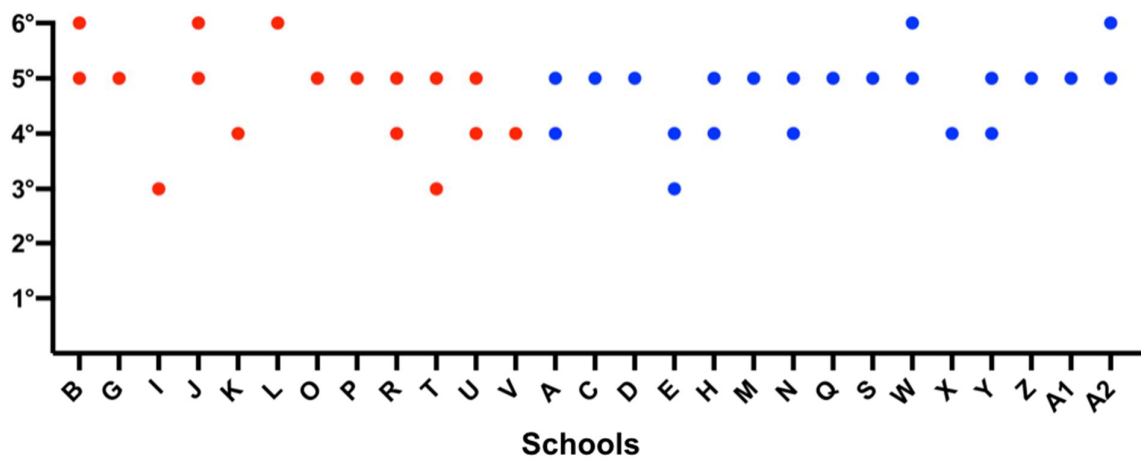

Supplement: s1 [file s1]
